# Supplementary material
Source: PubMed Central journal article supplement (PMC8221729)
Supplement: mmc1.pdf [file mmc1.pdf]

# THE LANCET Microbe

## Supplementary appendix

This appendix formed part of the original submission and has been peer reviewed. We post it as supplied by the authors.

Supplement to: Kula BE, Clancy CJ, NguyenMH, Schwartz IS. Invasive mould disease in fatal COVID-19: a systematic review of autopsies. *Lancet Microbe* 2021; published online June 23. [https://doi.org/10.1016/S2666-5247\(21\)00091-4](https://doi.org/10.1016/S2666-5247(21)00091-4).

**Supplemental Table - Autopsy Case Summaries**

| Case | First author, Case No. | Age   | Sex | Comorbidities                                                                                                      | Length of hospital stay, days | Invasive mechanical ventilation (days) | Immunomodulation | Antifungals                | Autopsy-proven IMD |
|------|------------------------|-------|-----|--------------------------------------------------------------------------------------------------------------------|-------------------------------|----------------------------------------|------------------|----------------------------|--------------------|
| 1    | Lax 1                  | 80-89 | M   | DM, CAD, HTN, CVD                                                                                                  | 4                             | No                                     |                  |                            | No                 |
| 2    | Lax 2                  | 80-89 | M   | DM, HTN, CVD                                                                                                       | 9                             | No                                     |                  |                            | No                 |
| 3    | Lax 3                  | 80-89 | F   | HTN, CAD, prev malignancy                                                                                          | 6                             | No                                     |                  |                            | No                 |
| 4    | Lax 4                  | 80-89 | M   | previous malignancy                                                                                                | 7                             | No                                     |                  |                            | No                 |
| 5    | Lax 5                  | 80-89 | M   | HTN, CAD, prev malignancy                                                                                          | 6                             | Yes (ND)                               |                  |                            | No                 |
| 6    | Lax 6                  | 80-89 | M   | HTN, CAD, COPD, CVD                                                                                                | 8                             | No                                     |                  |                            | No                 |
| 7    | Lax 7                  | 80-89 | F   | HTN, DM, COPD, dementia                                                                                            | 4                             | No                                     |                  |                            | No                 |
| 8    | Lax 8                  | 70-79 | F   | HTN, DM, Dementia                                                                                                  | 5                             | No                                     |                  |                            | No                 |
| 9    | Lax 9                  | 60-69 | M   | Dementia                                                                                                           | 6                             | No                                     |                  |                            | No                 |
| 10   | Lax 10                 | 90-99 | M   | HTN, DM, Dementia                                                                                                  | 9                             | No                                     |                  |                            | No                 |
| 11   | Lax 11                 | 70-79 | M   | HTN                                                                                                                | 11                            | Yes (ND)                               |                  | Caspofungin, Anidulafungin | No                 |
| 12   | Bradley 1              | 57    | M   | ESRD, DM2, HTN, OSA, obesity                                                                                       | 6                             | Yes (6)                                |                  |                            | No                 |
| 13   | Bradley 2              | 74    | F   | DM2, OSA, AF, pulmonary hypertension, CKD, obesity                                                                 | 0                             | Yes (1)                                |                  |                            | No                 |
| 14   | Bradley 3              | 54    | M   | Traumatic brain injury, dysphagia                                                                                  | 1                             | No                                     |                  |                            | No                 |
| 15   | Bradley 4              | 74    | M   | CHF, frontotemporal dementia, HTN, OSA                                                                             | 1                             | Yes (ND)                               |                  |                            | No                 |
| 16   | Bradley 5              | 73    | F   | DM2, HTN, CHF, hypothyroidism, obesity, schizoaffective disorder, bipolar disorder                                 | 8                             | Yes (8)                                |                  |                            | No                 |
| 17   | Bradley 6              | 84    | F   | COPD, CHF, AF, aortic stenosis, HTN, CKD, osteoporosis                                                             | 1                             | No                                     |                  |                            | No                 |
| 18   | Bradley 7              | 71    | M   | HTN, hyperlipidaemia, CAD, AF, ESRD, OSA, KTx                                                                      | 8                             | No                                     |                  |                            | No                 |
| 19   | Bradley 8              | 76    | F   | Hyperlipidaemia, osteoporosis                                                                                      | 4                             | Yes (4)                                |                  |                            | No                 |
| 20   | Bradley 9              | 75    | F   | Hyperlipidaemia, DM2, CAD, CHF, CKD, COPD, prior DVT                                                               |                               |                                        |                  |                            | No                 |
| 21   | Bradley 10             | 84    | M   | CKD, COPD, hyperlipidaemia, OSA, mitral regurgitation, complete heart block, chronic pain, arthritis, obesity, HTN | 1                             | No                                     |                  |                            | No                 |

|    |              |    |   |                                                                                                                                              |    |          |            |    |
|----|--------------|----|---|----------------------------------------------------------------------------------------------------------------------------------------------|----|----------|------------|----|
| 22 | Bradley 11   | 81 | F | HTN, hyperlipidaemia, breast cancer, CKD, demyelinating neuropathy, lacunar infarcts, recent pneumonia in January, 2020, Alzheimer's disease | 6  | Yes (2)  |            | No |
| 23 | Bradley 12   | 42 | F | Lobular breast cancer status post-bilateral mastectomy and neoadjuvant chemotherapy and anaemia                                              | 9  | Yes      |            | No |
| 24 | Bradley 13   | 71 | M | CAD, CHF, HTN, aortic stenosis, ESRD, pulmonary fibrosis                                                                                     |    |          |            | No |
| 25 | Bradley 14   | 73 | F | HTN, asthma, DM, hyperlipidaemia,                                                                                                            |    |          |            | No |
| 26 | Fox 1        | 44 |   | HTN, DM, CKD3                                                                                                                                | 8  | Yes (6)  |            | No |
| 27 | Fox 2        | 44 |   | DM2, HTN, CHF                                                                                                                                | 5  | Yes (2)  |            | No |
| 28 | Fox 3        | 63 |   | HTN, thyroidectomy                                                                                                                           | 25 | Yes (25) | steroids   | No |
| 29 | Fox 4        | 76 |   | HTM, DM2, RA on methotrexate                                                                                                                 | 6  | Yes (6)  |            | No |
| 30 | Fox 5        | 68 |   | DM                                                                                                                                           | 9  | Yes (9)  |            | No |
| 31 | Fox 6        | 78 |   | None                                                                                                                                         | 0  | No       |            | No |
| 32 | Fox 7        | 53 |   | HTN, polymyositis, OSA; on methotrexate, prednisone                                                                                          | 1  | Yes (1)  |            | No |
| 33 | Fox 8        | 60 |   | COPD, HTN, AF                                                                                                                                | 14 | Yes (14) |            | No |
| 34 | Fox 9        | 66 |   | HTN                                                                                                                                          | 12 | Yes (12) |            | No |
| 35 | Fox 10       | 78 |   | ESRD, DM2                                                                                                                                    | 2  | Yes (2)  |            | No |
| 36 | Prilutskiy 1 | 72 | M |                                                                                                                                              |    | Yes (11) | Anakinra   | No |
| 37 | Prilutskiy 2 | 91 | M |                                                                                                                                              |    | No       |            | No |
| 38 | Prilutskiy 3 | 72 | M |                                                                                                                                              |    | No       | Sarilumab  | No |
| 39 | Prilutskiy 4 | 64 | F |                                                                                                                                              |    | Yes (3)  | Sarilumab  | No |
| 40 | Menter 1     | 68 | F | MS                                                                                                                                           |    | ND       |            | No |
| 41 | Menter 2     | 86 | M | tMDS, s/p APLM, prostate cancer, DM                                                                                                          |    | ND       | no details | No |
| 42 | Menter 3     | 96 | M | Parkinsons, dementia, CAD                                                                                                                    |    | ND       |            | No |
| 43 | Menter 4     | 78 | M | Chronic renal failure, DM                                                                                                                    |    | ND       |            | No |
| 44 | Menter 5     | 66 | M | Smoker, HTN                                                                                                                                  |    | ND       |            | No |
| 45 | Menter 6     | 74 | M | Met prostate CA, CKD, smoker, COPD, DM                                                                                                       |    | ND       |            | No |
| 46 | Menter 7     | 81 | F | CAD                                                                                                                                          |    | ND       |            | No |
| 47 | Menter 8     | 71 | M | PAD, CAD                                                                                                                                     |    | ND       |            | No |
| 48 | Menter 9     | 88 | M | CHF, CAD, Waldenstrom's macroglobulinemia                                                                                                    |    | ND       |            | No |
| 49 | Menter 10    | 85 | M | cardiomyopathy, ex smoker                                                                                                                    |    | ND       |            | No |

|    |              |    |    |                                                                               |  |          |          |     |
|----|--------------|----|----|-------------------------------------------------------------------------------|--|----------|----------|-----|
| 50 | Menter 11    | 58 | M  | HTN, obesity                                                                  |  | ND       |          | No  |
| 51 | Menter 12    | 75 | M  | HTN, CAD, DM                                                                  |  | ND       |          | No  |
| 52 | Menter 13    | 53 | M  | Cirrhosis, "immunosuppressed";<br>s/p pneumonia assoc ARDS on<br>long term O2 |  | ND       |          | No  |
| 53 | Menter 14    | 94 | F  | cardiac disease, dementia                                                     |  | ND       |          | No  |
| 54 | Menter 15    | 89 | M  | cardiac disease, DM                                                           |  | ND       |          | No  |
| 55 | Menter 16    | 61 | F  | DM, obesity                                                                   |  | ND       |          | No  |
| 56 | Menter 17    | 72 | M  | sleep apnea, htn, ex smoker                                                   |  | ND       |          | No  |
| 57 | Menter 18    | 79 | M  | CAD, dementia                                                                 |  | ND       |          | No  |
| 58 | Menter 19    | 65 | M  | 90 py smoker                                                                  |  | ND       |          | No  |
| 59 | Menter 20    | 71 | M  | COPD, obesity                                                                 |  | ND       |          | No  |
| 60 | Menter 21    | 96 | M  | CAD, dementia                                                                 |  | ND       |          | No  |
| 61 | Schaller 1   |    | NA | Chronic myelomonocytic<br>leukemia                                            |  | Yes (21) |          | No  |
| 62 | Schaller 2   |    | NA | CAD, AF, CLL                                                                  |  | Yes (14) |          | No  |
| 63 | Schaller 3   |    | NA | COPD, diabetes                                                                |  | Yes (6)  |          | No  |
| 64 | Schaller 4   |    | NA | CKD, AF, DCM                                                                  |  | Yes (8)  |          | No  |
| 65 | Schaller 5   |    | NA | Hypertrophic CM                                                               |  | No       |          | No  |
| 66 | Schaller 6   |    | NA | HTN, AF                                                                       |  | No       |          | No  |
| 67 | Schaller 7   |    | NA | Lung cancer (stage IV), CKD                                                   |  | No       |          | No  |
| 68 | Schaller 8   |    | NA | COPD, CKD, DM, obesity                                                        |  | No       |          | No  |
| 69 | Schaller 9   |    | NA | HTN, AF, dementia                                                             |  | No       |          | No  |
| 70 | Schaller 10  |    | NA | HTN                                                                           |  | No       |          | No  |
| 71 | Remmelink 1  | 77 | M  | CAD CVD Diabetes                                                              |  | Yes (ND) |          | No  |
| 72 | Remmelink 2  | 91 | F  | HTN, CAD, CRF, cirrhosis                                                      |  | No (ND)  | steroids | No  |
| 73 | Remmelink 3  | 68 | M  | COPD, Cancer                                                                  |  | Yes (ND) |          | No  |
| 74 | Remmelink 4  | 64 | F  | HTN, cancer, CVD                                                              |  | Yes (ND) |          | No  |
| 75 | Remmelink 5  | 56 | M  | COPD, cancer                                                                  |  | Yes (ND) |          | No  |
| 76 | Remmelink 6  | 73 | M  | HTN, CRF                                                                      |  | Yes (ND) | steroids | Yes |
| 77 | Remmelink 7  | 56 | M  | None                                                                          |  | No       |          | Yes |
| 78 | Remmelink 8  | 66 | M  | HTN, CAD, CVD, CRF, DM                                                        |  | No       |          | No  |
| 79 | Remmelink 9  | 49 | F  | HTN, DM                                                                       |  | Yes (ND) |          | No  |
| 80 | Remmelink 10 | 63 | M  | HTN, DM                                                                       |  | Yes (ND) |          | No  |
| 81 | Remmelink 11 | 76 | M  | DM, cirrhosis, cancer                                                         |  | No       |          | No  |
| 82 | Remmelink 12 | 75 | M  | DM, CAD, HTN                                                                  |  | Yes (ND) |          | No  |
| 83 | Remmelink 13 | 73 | M  | DM                                                                            |  | No       |          | No  |
| 84 | Remmelink 14 | 77 | F  | DM, HTN                                                                       |  | No       |          | No  |

|     |                    |    |   |                                                     |    |          |                |               |     |
|-----|--------------------|----|---|-----------------------------------------------------|----|----------|----------------|---------------|-----|
| 85  | Remmelink 15       | 61 | M | none                                                |    | Yes (ND) |                |               | No  |
| 86  | Remmelink 16       | 70 | F | Liver transplant, DM, HTN                           |    | Yes (ND) |                |               | No  |
| 87  | Remmelink 17       | 53 | M | HTN, CVD                                            |    | Yes (ND) |                |               | No  |
| 88  | Deinhardt-Emmer 1  | 82 | M | AF, DM, autoimmune pancreatitis, purpura pigmentosa | 7  | Yes (7)  |                |               | No  |
| 89  | Deinhardt-Emmer 2  | 66 | M | HTN                                                 | 5  | Yes (4)  |                |               | No  |
| 90  | Deinhardt-Emmer 3  | 78 | M | HTN, DM, CRF, recent urosepsis                      | 30 | Yes (7)  |                |               | Yes |
| 91  | Deinhardt-Emmer 4  | 54 | M | none known                                          | 10 | Yes (7)  |                |               | No  |
| 92  | Deinhardt-Emmer 5  | 80 | M | DM, CRF, CHF                                        | 9  | Yes (8)  |                |               | No  |
| 93  | Deinhardt-Emmer 6  | 64 | M | GPA, CRF, COPD, DM                                  | 20 | Yes (16) |                |               | No  |
| 94  | Deinhardt-Emmer 7  | 64 | M | COPD, AS                                            | 15 | Yes (9)  |                |               | No  |
| 95  | Deinhardt-Emmer 8  | 87 | F | DM, CHF, CRF, CVA, erysipelas recently              | 12 | No       |                |               | No  |
| 96  | Deinhardt-Emmer 9  | 83 | F | HTN, DM, CRF, CHD, AF, PAD                          | 7  | No       |                |               | No  |
| 97  | Deinhardt-Emmer 10 | 85 | F | Endometrial cancer (apT1a); CHF, CRF, DM            | 9  | No       |                |               | No  |
| 98  | Deinhardt-Emmer 11 | 52 | F | Cervical cancer (stage 4)                           | 4  | No       |                |               | No  |
| 99  | Martines 1         |    |   |                                                     |    | ND       |                |               | No  |
| 100 | Martines 2         |    |   | CHF, cardiomegaly                                   |    | ND       |                |               | No  |
| 101 | Martines 3         |    |   | COPD, obesity, kidney transplant                    |    | ND       |                |               | No  |
| 102 | Martines 4         |    |   |                                                     |    | ND       |                |               | No  |
| 103 | Martines 5         |    |   |                                                     |    | ND       |                |               | No  |
| 104 | Martines 6         |    |   |                                                     |    | ND       |                |               | No  |
| 105 | Martines 7         |    |   |                                                     |    | ND       |                |               | No  |
| 106 | Martines 8         |    |   |                                                     |    | ND       |                |               | No  |
| 107 | Elezkurtaj 1       | 54 | M | HIV on therapy, smoker, COPD, obesity               |    | ND       |                | Anidulafungin | No  |
| 108 | Elezkurtaj 2       | 62 | M | DM, CHF, obesity, OSA, HTN                          |    | ND       |                |               | No  |
| 109 | Elezkurtaj 3       | 45 | F | COPD, asthma, mesenteric infarct                    |    | ND       |                |               | No  |
| 110 | Elezkurtaj 4       | 71 | M | Asthma, AF, HTN, sinus node arrest                  |    | ND       | Hydrocortisone | Anidulafungin | No  |
| 111 | Elezkurtaj 5       | 79 | F | IHD, HTN, obesity, OSA                              |    | ND       | Hydrocortisone |               | No  |
| 112 | Elezkurtaj 6       | 90 | F | COPD, dementia, cirrhosis, CAD, CRF, AF             |    | ND       |                |               | No  |
| 113 | Elezkurtaj 7       | 79 | M | hemiplegia, PE                                      |    | ND       | Hydrocortisone |               | No  |
| 114 | Elezkurtaj 8       | 79 | F | DM, dementia, RA, IHD, stroke                       |    | ND       |                |               | No  |

|     |               |    |   |                                                                                  |    |          |                |                             |                                                     |
|-----|---------------|----|---|----------------------------------------------------------------------------------|----|----------|----------------|-----------------------------|-----------------------------------------------------|
| 115 | Elezkurtaj 9  | 68 | M | Alcohol abuse, heart failure, obesity                                            |    | ND       |                | Amphotericin B, caspofungin | No                                                  |
| 116 | Elezkurtaj 10 | 61 | M | CHF, AF, IHD, smoking, obesity                                                   |    | ND       | Hydrocortisone | Caspofungin                 | No                                                  |
| 117 | Elezkurtaj 11 | 68 | F | COPD, HTN, obesity                                                               |    | ND       |                | Anidulafungin, fluconazole  | No                                                  |
| 118 | Elezkurtaj 12 | 68 | M | Squamous cell lung cancer, HIV, IH, CVA, CRF, COPD                               |    | ND       |                |                             | No                                                  |
| 119 | Elezkurtaj 13 | 76 | M | CHF, IHD, obesity, smoking, HTN                                                  |    | ND       |                |                             | No                                                  |
| 120 | Elezkurtaj 14 | 56 | F | DM, HTN, obesity                                                                 |    | ND       |                | Anidulafungin               | No                                                  |
| 121 | Elezkurtaj 15 | 92 | M | AF, dementia, IHD                                                                |    | ND       |                | Amphotericin B              | No                                                  |
| 122 | Elezkurtaj 16 | 62 | M | Dementia, HTN, recent femur fracture                                             |    | ND       |                |                             | No                                                  |
| 123 | Elezkurtaj 17 | 67 | F | AF, COPD, RA, stroke                                                             |    | ND       |                |                             | No                                                  |
| 124 | Elezkurtaj 18 | 81 | M | AF, DM, HTN, stroke                                                              |    | ND       |                |                             | No                                                  |
| 125 | Elezkurtaj 19 | 78 | F | metastatic lung CA (brain, liver, bone), radiation pneumonitis, AF, HTN, obesity |    | ND       |                |                             | No                                                  |
| 126 | Elezkurtaj 20 | 74 | M | AF, HTN, IHD, obesity                                                            |    | ND       |                |                             | No                                                  |
| 127 | Elezkurtaj 21 | 76 | M | PE                                                                               |    | ND       |                |                             | No                                                  |
| 128 | Elezkurtaj 22 | 30 | F | Ewing Sarcoma, AlloHSCT for secondary MDS, intestinal GVHD                       |    | Yes (1)  |                |                             | No (pseudohyphae & yeasts in context of candidemia) |
| 129 | Elezkurtaj 23 | 77 | M | HTN                                                                              |    | ND       | Dexamethasone  | Caspofungin                 | No                                                  |
| 130 | Elezkurtaj 24 | 69 | M | HTN                                                                              |    | ND       |                |                             | No                                                  |
| 131 | Elezkurtaj 25 | 57 | M | ND                                                                               |    | ND       |                | Caspofungin                 | No                                                  |
| 132 | Elezkurtaj 26 | 74 | M | ND                                                                               |    | ND       |                |                             | No                                                  |
| 133 | Youd 1        | 88 | F | Dementia                                                                         | 0  | No       |                |                             | No                                                  |
| 134 | Youd 2        | 86 | M | COPD, HTN, dementia, heart disease                                               | 0  | No       |                |                             | No                                                  |
| 135 | Youd 3        | 73 | F | DM1, asthma, heart disease                                                       | 0  | No       |                |                             | No                                                  |
| 136 | Bosmuller 1   | 78 | F | Obese, HTN, AV block                                                             | 1  | No       |                |                             | No                                                  |
| 137 | Bosmuller 2   | 78 | M | CAD, HTN, DM, parkinsons                                                         | 9  | Yes (8)  |                |                             | No                                                  |
| 138 | Bosmuller 3   | 72 | M | CAD, Merkel cell cA under adjuvant radiotherapy, PMR, obesity                    | 16 | Yes (11) |                |                             | No                                                  |
| 139 | Bosmuller 4   | 59 | M | Obese, HTN, asthma                                                               | 35 | Yes (35) |                |                             | No                                                  |

|     |            |    |   |                                                               |    |          |             |     |
|-----|------------|----|---|---------------------------------------------------------------|----|----------|-------------|-----|
| 140 | Buja 1     | 62 | M | Obese                                                         | 0  | No       |             | No  |
| 141 | Buja 2     | 34 | M | obese, HTN, heart failure, DM2                                | 10 | No       |             | No  |
| 142 | Buja 3     | 48 | M | obese                                                         | 0  | No       |             | No  |
| 143 | Hanley 1   | 61 | M | COPD, IHD, CABG                                               | 0  | No       |             | No  |
| 144 | Hanley 2   | 64 | M | OSA, obesity                                                  | 9  | Yes (6)  |             | No  |
| 145 | Hanley 3   | 69 | F | COPD, OSA< Cor pulmonarle on O2, iHD, DM2, HTN                | 3  | No       |             | No  |
| 146 | Hanley 4   | 78 | M | Dementia, DM, HTN                                             | 8  | No       |             | No  |
| 147 | Hanley 5   | 22 | M | obesity, hypothyroidism                                       | 22 | Yes (22) | Caspofungin | Yes |
| 148 | Hanley 6   | 24 | M | NASH, GRH deficiency                                          |    | Yes (ND) |             | No  |
| 149 | Hanley 7   | 77 | F | HTN, LVH, CKD, ANCA vasculitis                                | 2  | No       |             | No  |
| 150 | Hanley 7   | 79 | M | Hypercholesterolemia, trigeminal neuralgia                    |    | Yes (13) |             | No  |
| 151 | Hanley 8   | 97 | M | Dementia, liver disease, remove bladder cancer, recurrent UTI |    | No       |             | No  |
| 152 | Hanley 9   | 79 | F | COPD, SLE, DM, HTN                                            |    | No       |             | No  |
| 153 | Hanley 10  | 77 | F | ANCA vasculitis, CKD, LVH, HTN                                | 2  | No       |             | No  |
| 154 | Borczuk 1  | 64 | M | Diabetes. HTN, CAD                                            |    | No       |             | No  |
| 155 | Borczuk 2  | 73 | M | Pre-Diabetes, COPD                                            |    | Yes (5)  | steroids    | No  |
| 156 | Borczuk 3  | 71 | M | Diabetes, HTN                                                 |    | No       |             | No  |
| 157 | Borczuk 4  | 79 | M | Pre-Diabetes, Obesity HTN                                     |    | Yes (7)  |             | No  |
| 158 | Borczuk 5  | 95 | F | HTN, Dementia                                                 |    | No       |             | No  |
| 159 | Borczuk 6  | 34 | M | DM2                                                           |    | Yes (7)  |             | No  |
| 160 | Borczuk 7  | 69 | M | AML, DM2                                                      |    | No       |             | No  |
| 161 | Borczuk 8  | 46 | M | DM2, HTN, Asthma                                              |    | Yes (7)  |             | No  |
| 162 | Borczuk 9  | 91 | M | CAD, HTN, ALZ                                                 |    | No       |             | No  |
| 163 | Borczuk 10 | 56 | F | DM2, HTN, Sickle cell                                         |    | No       |             | No  |
| 164 | Borczuk 11 | 75 | M | HTN, Lung Ca                                                  |    | Yes (25) |             | No  |
| 165 | Borczuk 12 | 58 | M | DM2, HTN, CAD, cholangiocarcinoma                             |    | No       |             | No  |
| 166 | Borczuk 13 | 64 | M | DM2, ESRD, HTN                                                |    | No       |             | No  |
| 167 | Borczuk 14 | 70 | M | Arteritis                                                     |    | No       | steroids    | No  |
| 168 | Borczuk 15 | 47 | M | None                                                          |    | No       |             | No  |
| 169 | Borczuk 16 | 64 | M | Sleep apnea, CAD                                              |    | No       |             | No  |
| 170 | Borczuk 17 | 87 | F | DM2, CAD, Dementia                                            |    | No       |             | No  |

|     |            |    |   |                                                                                       |  |          |          |     |
|-----|------------|----|---|---------------------------------------------------------------------------------------|--|----------|----------|-----|
| 171 | Borczuk 18 | 70 | F | Pre-diabetes                                                                          |  | Yes (24) |          | No  |
| 172 | Borczuk 19 | 70 | M | NA                                                                                    |  | No       |          | No  |
| 173 | Borczuk 20 | 30 | F | Pulmonary valve atresia, DM                                                           |  | Yes (12) |          | No  |
| 174 | Borczuk 21 | 69 | M | HTN, hyperlipidemia, Obesity, Diabetes HbA1c=7.0                                      |  | Yes (17) |          | No  |
| 175 | Borczuk 22 | 92 | M | HTN, hyperlipidemia, CVA                                                              |  | No       |          | No  |
| 176 | Borczuk 23 | 58 | M | HTN, DM2, CAD                                                                         |  | Yes (25) | steroids | No  |
| 177 | Borczuk 24 | 82 | M | Hypertension; AF                                                                      |  | No       |          | No  |
| 178 | Borczuk 25 | 69 | F | Hypertension; CRF                                                                     |  | Yes (5)  |          | No  |
| 179 | Borczuk 26 | 76 | M | DM, Hypertension, Valvulopathy                                                        |  | Yes (5)  |          | No  |
| 180 | Borczuk 27 | 71 | M | Hypertension                                                                          |  | Yes (1)  |          | No  |
| 181 | Borczuk 28 | 87 | F | HTN, dyslipidemia; IHD; carotid vasculopathy                                          |  | No       |          | No  |
| 182 | Borczuk 29 | 79 | M | dementia, heart failure, intestinal ischemia                                          |  | Yes (6)  |          | Yes |
| 183 | Borczuk 30 | 85 | M | COPD; Alz dementia; carotid vasculopathy; chronic anemia; intestinal angiodysplasias  |  | No       |          | No  |
| 184 | Borczuk 31 | 76 | M | Hypertension, COPD                                                                    |  | Yes (19) |          | No  |
| 185 | Borczuk 32 | 86 | F | dementia; DM 2; DVT; hypothyroidism; dementia; HTN                                    |  | No       |          | No  |
| 186 | Borczuk 33 | 96 | M | diabetes type 2; HF; dementia; chronic cerebral vasculopathy                          |  | No       |          | No  |
| 187 | Borczuk 34 | 86 | M | Multiple myeloma; AF; obesity; OSAS                                                   |  | No       |          | No  |
| 188 | Borczuk 35 | 77 | M | DM, Hypertension, Vasculopathy, Kidney transplant                                     |  | No       |          | No  |
| 189 | Borczuk 36 | 90 | F | CKD; HF NYHA 3; recurrence PE; HTN                                                    |  | No       |          | No  |
| 190 | Borczuk 37 | 80 | M | CKD; hypertension; dementia; prostatic cancer                                         |  | No       |          | No  |
| 191 | Borczuk 38 | 73 | F | lung cancer                                                                           |  | No       |          | No  |
| 192 | Borczuk 39 | 61 | M | COPD, heart failure, pharyngeal cancer                                                |  | No       |          | Yes |
| 193 | Borczuk 40 | 82 | M | COPD; diabetes type 2; ischemic heart disease; obesity; hypertension; aortic aneurysm |  | No       |          | No  |
| 194 | Borczuk 41 | 75 | M | None                                                                                  |  | Yes (20) |          | No  |



|     |            |    |   |                                                                                                  |          |             |    |
|-----|------------|----|---|--------------------------------------------------------------------------------------------------|----------|-------------|----|
| 195 | Borczuk 42 | 95 | M | colon cancer, HBV, Atrial Fibrillation                                                           | No       |             | No |
| 196 | Borczuk 43 | 88 | F | ischemic stroke; diabetes type2; indiff connectivite; hypothyroidism; hypertensive heart disease | No       |             | No |
| 197 | Borczuk 44 | 57 | M | Diabetes, HTN, HLD, Obesity                                                                      | Yes (5)  | steroids    | No |
| 198 | Borczuk 45 | 37 | M | obesity                                                                                          | Yes (1)  |             | No |
| 199 | Borczuk 46 | 67 | F | HTN, asthma                                                                                      | No       |             | No |
| 200 | Borczuk 47 | 82 | F | ND                                                                                               | No       |             | No |
| 201 | Borczuk 48 | 69 | M | CAD, s/p CABG, diabetes, HTN, Paf                                                                | Yes (2)  |             | No |
| 202 | Borczuk 49 | 48 | M | HIV, asthma                                                                                      | Yes (6)  | steroids    | No |
| 203 | Borczuk 50 | 85 | F | DM, HTN, Sjogren, AD, Parkinson, schizophrenia                                                   | No       |             | No |
| 204 | Borczuk 51 | 73 | M | Hepatitis C, Kidney transplant, CHF, HTN, diabetes, AF                                           | No       |             | No |
| 205 | Borczuk 52 | 39 | F | Liver transplantation, diabetes, HTN, Obesity                                                    | Yes (3)  | steroids    | No |
| 206 | Borczuk 53 | 48 | M | NA                                                                                               | No       |             | No |
| 207 | Borczuk 54 | 74 | M | Parkison                                                                                         | No       | tocilizumab | No |
| 208 | Borczuk 55 | 79 | M | diabetes, HTN, HLD, CVA, CKDIII, HX                                                              | No       |             | No |
| 209 | Borczuk 56 | 50 | M | Sarcoidosis with PHTN, HTN, Obesity                                                              | Yes (4)  | steroids    | No |
| 210 | Borczuk 57 | 64 | M | COPD/Emphysema, HTN, diabetes                                                                    | Yes (1)  |             | No |
| 211 | Borczuk 58 | 51 | M | obesity                                                                                          | No       |             | No |
| 212 | Borczuk 59 | 57 | F | HTN, Gout, CKD, HLD                                                                              | No       |             | No |
| 213 | Borczuk 60 | 79 | F | Diabetes, HTN, HLD, asthma                                                                       | Yes (6)  |             | No |
| 214 | Borczuk 61 | 79 | F | CHF, HTN, AF , CKD                                                                               | No       |             | No |
| 215 | Borczuk 62 | 57 | M | HTN, HLD, Obesity                                                                                | Yes (1)  |             | No |
| 216 | Borczuk 63 | 82 | M | HFrEF (NYA class III e IV), AF, AT                                                               | No       |             | No |
| 217 | Borczuk 64 | 86 | F | CAD,HFiEF, HTN, AF                                                                               | No       |             | No |
| 218 | Borczuk 65 | 83 | F | HTN, diabetes, obesity, CKD, asthma                                                              | No       | steroids    | No |
| 219 | Borczuk 66 | 52 | F | HTN, Obesity                                                                                     | Yes (13) | steroids    | No |
| 220 | Borczuk 67 | 74 | M | HTN, diabetes, asthma                                                                            | Yes (7)  | steroids    | No |
| 221 | Borczuk 68 | 68 | M | HIV, Kidney transplant                                                                           | Yes (18) | steroids    | No |
| 222 | Wichmann 1 | 52 | M | Obesity                                                                                          | No       |             | No |

|     |             |    |   |                                                                                                   |    |          |  |     |
|-----|-------------|----|---|---------------------------------------------------------------------------------------------------|----|----------|--|-----|
| 223 | Wichmann 2  | 70 | M | Parkinsons, CHD, PAD, CKD                                                                         |    | No       |  | No  |
| 224 | Wichmann 3  | 71 | M | AH, granulomatous pneumopathy                                                                     |    | Yes (ND) |  | No  |
| 225 | Wichmann 4  | 63 | M | DM2, obesity, asthma                                                                              |    | Yes (ND) |  | No  |
| 226 | Wichmann 5  | 66 | M | CAD, HTN, AF , CKD                                                                                |    | No       |  | No  |
| 227 | Wichmann 6  | 54 | F | Dementia, trisomy 21, epilepsy                                                                    |    | No       |  | No  |
| 228 | Wichmann 7  | 75 | F | AF, CAD, smoker                                                                                   |    | No       |  | No  |
| 229 | Wichmann 8  | 82 | M | Parkinsons, DM2, CAD                                                                              |    | No       |  | No  |
| 230 | Wichmann 9  | 87 | F | NSCLCa, COPD, CAD, CKD                                                                            |    | No       |  | No  |
| 231 | Wichmann 10 | 84 | M | DM2, HTN, Ulcerative colitis                                                                      |    | No       |  | No  |
| 232 | Wichmann 11 | 85 | M | HD, HTN, AF, asthma                                                                               |    | Yes (ND) |  | No  |
| 233 | Wichmann 12 | 76 | M | Obesity                                                                                           |    | Yes (ND) |  | No  |
| 234 | Schaefer 1  | 66 | F | RA, pulm fibrosis, SLE, MGUS, CKD, CAD, HTN                                                       | 7  | Yes (3)  |  | No  |
| 235 | Schaefer 2  | 57 | M | DM, HTN, neurologic impairment                                                                    | 1  | Yes (1)  |  | No  |
| 236 | Schaefer 3  | 77 | M | CKD, cardiomegaly, atherosclerosis, DM, dementia                                                  | 3  | Yes (3)  |  | No  |
| 237 | Schaefer 4  | 50 | M | B-ALL in relapse, Aspergillus pneumonia, feb neut                                                 | 11 | Yes (7)  |  | Yes |
| 238 | Schaefer 5  | 68 | F | CAD, HTN, DM, COPD, smoker >50 py                                                                 | 1  | Yes (1)  |  | No  |
| 239 | Schaefer 6  | 66 | M | HTN, DM                                                                                           | 16 | Yes (15) |  | No  |
| 240 | Schaefer 7  | 53 | M | HTN, DM, CKD, NASH                                                                                | 21 | Yes (18) |  | No  |
| 241 | Falasca 1   | 81 | M | HTN, Aorto-myocardial sclerosis, IHD, Cardiomyopathy, Aortic aneurysm                             | 4  | ND       |  | No  |
| 242 | Falasca 2   | 82 | F | Diabetes, Atrioventricular valve prothesis, Atrial fibrillation, COPD, Malignancy, Kidney disease | 3  | ND       |  | No  |
| 243 | Falasca 3   | 92 | M | COPD                                                                                              | 1  | ND       |  | No  |
| 244 | Falasca 4   | 69 | F | Schizophrenia                                                                                     | 28 | ND       |  | No  |
| 245 | Falasca 5   | 80 | F | Cardiovascular disease, dementia                                                                  | 38 | ND       |  | No  |
| 246 | Falasca 6   | 92 | M | COPD, cardiovascular disease                                                                      | 3  | ND       |  | No  |
| 247 | Falasca 7   | 64 | F | Malignancy                                                                                        | 2  | ND       |  | No  |
| 248 | Falasca 8   | 58 | M | Pulmonary artery thrombosis                                                                       | 4  | ND       |  | No  |
| 249 | Falasca 9   | 64 | M | Myelodysplasia                                                                                    | 4  | ND       |  | No  |

|     |               |    |    |                                                                               |    |          |                       |     |
|-----|---------------|----|----|-------------------------------------------------------------------------------|----|----------|-----------------------|-----|
| 250 | Falasca 10    | 82 | M  | Aortic aneurysm, COPD                                                         | 5  | ND       |                       | No  |
| 251 | Falasca 11    | 76 | M  | Malignancy                                                                    | 30 | ND       |                       | No  |
| 252 | Falasca 12    | 60 | M  | Malignancy, HTN, kidney disease, DM, COPD, obesity                            | 29 | ND       |                       | No  |
| 253 | Falasca 13    | 70 | F  | cardiovascular disease, DM, psychiatric disorder                              | 43 | ND       |                       | No  |
| 254 | Falasca 14    | 76 | M  | malignancy, COPD, HTN, cardiovascular disease                                 | 33 | ND       |                       | No  |
| 255 | Falasca 15    | 27 | F  | HIV                                                                           | 6  | ND       |                       | No  |
| 256 | Falasca 16    | 82 | M  | parkinson's, hypertension, TIA, prostate hypertrophy                          | 14 | ND       |                       | No  |
| 257 | Falasca 17    | 57 | M  | DM                                                                            | 1  | ND       |                       | No  |
| 258 | Falasca 18    | 86 | M  | Staphylococcus aureus endocarditis, prostate hypertrophy, aortic aneurysm, AF | 1  | ND       |                       | No  |
| 259 | Falasca 19    | 54 | M  | None                                                                          | 16 | ND       |                       | No  |
| 260 | Falasca 20    | 35 | M  | None                                                                          | 7  | ND       |                       | No  |
| 261 | Falasca 21    | 65 | M  | None                                                                          | 12 | ND       |                       | No  |
| 262 | Falasca 22    | 43 | F  | None                                                                          | 25 | ND       |                       | No  |
| 263 | Rapkiewicz 1  | 64 | F  | COPD, lung CA                                                                 | 0  | No       |                       | No  |
| 264 | Rapkiewicz 2  | 60 | M  | CAD                                                                           | 0  | No       |                       | Yes |
| 265 | Rapkiewicz 3  | 50 | F  | none                                                                          | 2  | Yes (1)  |                       | No  |
| 266 | Rapkiewicz 4  | 44 | M  | Renal cell CA                                                                 | 6  | Yes (2)  |                       | No  |
| 267 | Rapkiewicz 5  | 64 | F  | OSA                                                                           | 9  | Yes (1)  | tocilizumab, anakinra | No  |
| 268 | Rapkiewicz 6  | 55 | F  | None                                                                          | 11 | Yes (9)  | tocilizumab           | No  |
| 269 | Rapkiewicz 7  | 65 | M  | Cirrhosis, PAD, CKD, hypothyroidism                                           | 3  | Yes (1)  | tocilizumab           | No  |
| 270 | Brook 1       | 91 | M  | ESRD on dialysis, h/o prostate ca, h/o PE, HTN                                | 10 | No       |                       | No  |
| 271 | Brook 2       | 82 | F  | HTN, DM2, TIA, dementia                                                       | 16 | No       |                       | No  |
| 272 | Brook 3       | 58 | F  | HTN, DM2, obesity, mild CKD                                                   | 40 | Yes (21) |                       | No  |
| 273 | Brook 4       | 79 | F  | ESRD on dialysis, HTN                                                         | 15 | Yes (14) |                       | No  |
| 274 | Brook 5       | 75 | M  | Myasthenia gravis, HTN, AFib                                                  | 30 | Yes (28) |                       | No  |
| 275 | Radermecker 1 | 56 | M  | COPD, asthma                                                                  | 18 | Yes (15) |                       | No  |
| 276 | Radermecker 2 | 63 | F  | DM2, anxiety                                                                  | 8  | Yes (8)  |                       | No  |
| 277 | Radermecker 3 | 51 | M  | DM2, HTN, fatty liver                                                         | 32 | Yes (32) |                       | Yes |
| 278 | Radermecker 4 | 73 | M  | Hypothyroidism                                                                | 22 | Yes (22) |                       | No  |
| 279 | Sauter 6      |    | NA | NA                                                                            |    | Yes (11) |                       | No  |

|     |                 |       |   |                                                                                        |    |          |          |    |
|-----|-----------------|-------|---|----------------------------------------------------------------------------------------|----|----------|----------|----|
| 280 | Beigmohammadi 1 | 58    | M | HTN                                                                                    | 7  | Yes (4)  |          | No |
| 281 | Beigmohammadi 2 | 84    | F | HTN                                                                                    | 3  | Yes (3)  |          | No |
| 282 | Beigmohammadi 3 | 72    | F | RA on MTX, prednisone, sulfasalazine                                                   | 15 | Yes (4)  |          | No |
| 283 | Beigmohammadi 4 | 72    | M | HTN, DM                                                                                | 4  | Yes (2)  |          | No |
| 284 | Beigmohammadi 5 | 68    | M | HTN, valvular heart disease                                                            | 19 | Yes (8)  |          | No |
| 285 | Beigmohammadi 6 | 46    | M | PUD                                                                                    | 16 | Yes (10) |          | No |
| 286 | Beigmohammadi 7 | 75    | M | None                                                                                   | 6  | Yes (5)  |          | No |
| 287 | Desai 1         | 70-79 | F | DM; psoriasis on methotrexate, HTN, obesity, OA                                        | 5  | No       |          | No |
| 288 | Desai 2         | 70-79 | M | Asthma, metastatic bladder cancer, prostate cancer, gout                               | 13 | Yes (ND) |          | No |
| 289 | Desai 3         | 50-59 | M | DM; NAFLD, hypothyroid, obesity, sciatica; on prednisone                               | 9  | Yes (ND) |          | No |
| 290 | Desai 4         | 60    | F | DM, HTN, hypothyroid, latent TB                                                        | 6  | Yes (ND) |          | No |
| 291 | Desai 5         | 60    | M | DM, HTN                                                                                | 5  | Yes (ND) |          | No |
| 292 | Desai 6         | 50-59 | M | DM, Renal transplant (2016), dm2, HTN, CAD, HLD, CHF                                   | 16 | Yes (ND) |          | No |
| 293 | Desai 7         | 70-79 | F | DM, HTN, HLD, GERD, Alzheimer's disease                                                | 1  | Yes (ND) |          | No |
| 294 | Desai 8         | 30    | M | DM, bipolar, autism, dev delay, psoriasis                                              | 3  | No       |          | No |
| 295 | Desai 9         | 70-79 | F | Alzheimer's disease, CKD, HTN, GERD, treated met Ovarian CA, panhypopit; on prednisone | 7  | No       | steroids | No |
| 296 | Desai 10        | 30    | F | HTN, OSA, obesity                                                                      | 7  | Yes      |          | No |
| 297 | Desai 11        | 40    | M | HTN, LBD, CKD, CVA, Addison's on prednisolone, sarcoidosis                             |    | No       |          | No |
| 298 | Desai 12        | 40    | M | DM, HCL, GERD                                                                          | 7  | Yes (ND) |          | No |
| 299 | Desai 13        | 80    | M | None                                                                                   | 15 | Yes (ND) |          | No |
| 300 | Desai 14        | 80    | M | Asthma, ulcerative colitis (sulfasalazine), HTN, dementia                              | 15 | No       |          | No |
| 301 | Desai 15        | 80    | F | CLL, DM, HTN, HLD, history of colon CA, achalasia                                      | 5  | No       |          | No |
| 302 | Desai 16        | 40    | F | Pulmonary sarcoidosis, neuropathy, extreme obesity, steroid-induced DM                 |    | No       |          | No |
| 303 | Desai 17        | 80    | M | HTN, COPD, BPH, OSA                                                                    | 14 | Yes (ND) |          | No |

|     |                |       |   |                                                              |    |          |          |    |
|-----|----------------|-------|---|--------------------------------------------------------------|----|----------|----------|----|
| 304 | Desai 18       | 40    | F | breast CA, CNS vascular malformation, fibromyalgia           | 1  | Yes (ND) |          | No |
| 305 | Desai 19       | 50    | M | HLD, obesity, asthma                                         | 17 | Yes (ND) |          | No |
| 306 | Desai 20       | 70-79 | M | dementia                                                     | 10 | Yes (ND) |          | No |
| 307 | Roden 1        | 71    | M | CAD                                                          |    | Yes (12) |          | No |
| 308 | Roden 2        | 86    | M | Cardiac amyloidosis, CAD                                     |    | No       |          | No |
| 309 | Roden 3        | 80    | M | CAD, HTN, dementia                                           |    | No       |          | No |
| 310 | Roden 4        | 74    | M | ILD                                                          |    | Yes (7)  |          | No |
| 311 | Roden 5        | 93    | M | CHF, dementia, CAD                                           |    | No       |          | No |
| 312 | Roden 6        | 77    | M | Dementia, HTN                                                |    | No       |          | No |
| 313 | Roden 7        | 94    | M | ILD, HTN, CAD                                                |    | No       |          | No |
| 314 | Roden 8        | 69    | F | DM2, COPD, HTN                                               |    | Yes (10) |          | No |
| 315 | Bussani 197.20 |       | M | Dementia, Parkinsons, ICH, HTN                               | 1  | Yes (ND) |          | No |
| 316 | Bussani 207.20 |       | F | AVR, pacemaker                                               | 21 | Yes (ND) |          | No |
| 317 | Bussani 210.20 |       | M | Ischemic cardiomyopathy                                      | 29 | Yes (ND) |          | No |
| 318 | Bussani 216.20 |       | M | PHTN, DM                                                     | 21 | Yes (ND) |          | No |
| 319 | Bussani 235.20 |       | M | Prostate CA, pyonephrosis, prev PE                           | 23 | Yes (ND) |          | No |
| 320 | Bussani 262.20 |       | M | DM, bladder CA, hypercholesterolemia                         | 18 | Yes (ND) |          | No |
| 321 | Bussani 165.20 |       | M | AVR, pacemaker, Lung CA, HTN                                 | 14 | No       |          | No |
| 322 | Bussani 241.20 |       | F | dementia, CVA                                                | 3  | No       |          | No |
| 323 | Bussani 257.20 |       | F | PE, COPD, lung, uterus, & kidney CA, PAOD                    | 10 | No       |          | No |
| 324 | Bussani 272.20 |       | M | seizures, urosepsis, AF, HTN, encephalopathy                 | 30 | No       | steroids | No |
| 325 | Bussani 276.20 |       | M | Leriche syndrome, DM, AF, HTN                                | 18 | No       |          | No |
| 326 | Bussani 277.20 |       | M | DM, HTN, CKD                                                 | 8  | No       |          | No |
| 327 | Bussani 285.20 |       | M | Met Lung CA, ICM, DM, HTN                                    | 26 | No       |          | No |
| 328 | Bussani 288.20 |       | F | CKD, ICM, AF, PE, pyonephrosis, nephrolithiasis              | 28 | No       |          | No |
| 329 | Bussani 301.20 |       | M | CKD, psychosis, gastric ca                                   | 8  | No       |          | No |
| 330 | Bussani 302.20 |       | M | Psychosis, dementia, antiphospholipid syndrome, HTN          | 60 | No       |          | No |
| 331 | Bussani 303.20 |       | m | Hypokinetic syndrome, tib fib fracture, DM, HTN, prostate ca | 17 | No       |          | No |
| 332 | Bussani 304.20 |       | M | HTN, CM, CVA                                                 | 9  | No       |          | No |
| 333 | Bussani 305.20 |       | M | DM, CHF, CKD, UTI, HTN                                       | 14 | No       |          | No |

|     |                |    |   |                                                                      |    |          |          |    |
|-----|----------------|----|---|----------------------------------------------------------------------|----|----------|----------|----|
| 334 | Bussani 306.20 |    | M | COPD, CHF                                                            | 24 | No       |          | No |
| 335 | Bussani 307.20 |    | F | Bronchiectasis, HTN, DM                                              | 7  | No       |          | No |
| 336 | Bussani 308.20 |    | M | Dysphagia, ab ingestis pneumonia, aki, vascular dementia, sigmoid ca | 6  | No       |          | No |
| 337 | Bussani 309.20 |    | F | Ulcers, CHF, pnacreatic CA, bronchiectasis, AF                       | 5  | No       |          | No |
| 338 | Bussani 310.20 |    | M | Dementia, HTN                                                        | 8  | No       |          | No |
| 339 | Bussani 311.20 |    | M | Dementia, prostate hypertrophia, asthma, cholelithiasis              | 15 | No       | steroids | No |
| 340 | Bussani 312.20 |    | M | CHF, MVR, htn, brain hemorrhage                                      | 14 | No       |          | No |
| 341 | Bussani 313.20 |    | M | CKD, cardiac amyloid, AF, HTN, dm, ischemic CM                       | 17 | No       |          | No |
| 342 | Bussani 314.20 |    | F | Parkinsons, breast CA, facet joint arthrosis                         | 24 | No       | steroids | No |
| 343 | Bussani 315.20 |    | F | Cervical CA, peritoneal Carcinomatosis                               | 28 | No       |          | No |
| 344 | Bussani 316.20 |    | F | Osteoporosis, fractures                                              | 7  | No       |          | No |
| 345 | Bussani 317.20 |    | M | Dementia, CHF                                                        | 4  | No       |          | No |
| 346 | Bussani 318.20 |    | M | Dementia, UTI                                                        | 2  | No       |          | No |
| 347 | Bussani 319.20 |    | F | Dementia, DM                                                         | 6  | No       |          | No |
| 348 | Bussani 320.20 |    | M | Ataxia, seizures, tracheostomy, nephrolithiasis                      | 13 | No       |          | No |
| 349 | Bussani 321.20 |    | F | Vertebral collapse, AF, paraparesis, syncope, HTN                    | 14 | No       |          | No |
| 350 | Bussani 322.20 |    | M | COPD, CHF, DM, CVA                                                   | 27 | No       |          | No |
| 351 | Bussani 323.20 |    | F | Gastric ulcer, fibrothorax, femur fracture, TKA, HTN                 | 27 | No       |          | No |
| 352 | Bussani 324.20 |    | F | Diverticulosis, colon CA, dementia, breast CA, gastric CA            | 14 | No       |          | No |
| 353 | Bussani 325.20 |    | F | CHF, DM, dementia, femur fracture                                    | 48 | No       |          | No |
| 354 | Bussani 326.20 |    | F | Dementia, meningioma                                                 | 3  | No       |          | No |
| 355 | Bussani 327.20 |    | F | Femure fracture, dementia                                            | 19 | No       |          | No |
| 356 | Li 1           | 51 | M | Pancreatic cancer                                                    | 3  | No       | steroids | No |
| 357 | Li 2           | 30 | M | Gastric cancer                                                       | 27 | Yes (27) | steroids | No |
| 358 | Li 3           | 77 | M | None                                                                 | 10 | Yes (6)  | steroids | No |
| 359 | Li 4           | 87 | M | HTN, DM2, renal failure, dementia                                    | 20 | No       |          | No |
| 360 | Li 5           | 66 | M | Liver cancer                                                         | 20 | Yes (20) | steroids | No |
| 361 | Li 6           | 84 | F | None                                                                 | 20 | Yes (20) | steroids | No |

|     |             |    |   |                              |    |          |          |    |
|-----|-------------|----|---|------------------------------|----|----------|----------|----|
| 362 | Li 7        | 70 | M | Lung cancer                  | 11 | Yes (5)  | steroids | No |
| 363 | Li 8        | 83 | F | CAD                          | 7  | No       | steroids | No |
| 364 | Li 9        | 70 | F | Lung cancer                  | 31 | No       | steroids | No |
| 365 | Li 10       | 62 | F | None                         | 30 | Yes (22) | steroids | No |
| 366 | Li 11       | 80 | M | HTN, dementia                | 49 | Yes (28) | steroids | No |
| 367 | Li 12       | 77 | M | Skin cancer                  | 20 | Yes (17) | steroids | No |
| 368 | Li 13       | 87 | F | CAD, DM2                     | 25 | No       |          | No |
| 369 | Li 14       | 52 | M | Asthma                       | 32 | Yes (32) | steroids | No |
| 370 | Li 15       | 42 | M | HTN                          | 45 | Yes (43) | steroids | No |
| 371 | Li 16       | 57 | M | None                         | 54 | Yes (42) | steroids | No |
| 372 | Li 17       | 67 | M | CKD                          | 65 | Yes (13) |          | No |
| 373 | Li 18       | 89 | F | None                         | 44 | Yes (45) |          | No |
| 374 | Li 19       | 60 | F | HTN                          | 16 | Yes (9)  | steroids | No |
| 375 | Li 20       | 63 | M | HTN                          | 24 | Yes (24) | steroids | No |
| 376 | Li 21       | 61 | M | None                         | 28 | Yes (28) | steroids | No |
| 377 | Li 22       | 64 | M | HTN, CAD                     | 37 | Yes (36) | steroids | No |
| 378 | Li 23       | 66 | M | HTN                          | 19 | Yes (18) | steroids | No |
| 379 | Li 24       | 55 | M | None                         | 29 | Yes (29) | steroids | No |
| 380 | Li 25       | 73 | M | HTN, gastric cancer          | 35 | Yes (35) | steroids | No |
| 381 | Li 26       | 91 | F | HTN, CAD                     | 31 | Yes (18) |          | No |
| 382 | Li 27       | 64 | M | None                         | 45 | Yes (28) | steroids | No |
| 383 | Li 28       | 78 | F | None                         | 53 | Yes (4)  | steroids | No |
| 384 | Li 29       | 70 | M | CVA, COPD, DM2               | 57 | Yes (56) |          | No |
| 385 | Li 30       | 70 | F | HTN, breast cancer           | 74 | Yes (39) |          | No |
| 386 | Oprinca 1   | 27 | M | OSA                          | 0  | No       |          | No |
| 387 | Oprinca 2   | 79 | F | HTN, CM, CAD, A fib          |    |          | steroids | No |
| 388 | Oprinca 3   | 70 | M | HTN, CAD, HF, CAD, CABG, CRF | 0  | No       |          | No |
| 389 | Flikweert 1 | 77 | M | None                         | 12 | Yes (10) |          | No |
| 390 | Flikweert 2 | 73 | F | None                         | 20 | Yes (16) | steroids | No |
| 391 | Flikweert 3 | 58 | F | None                         | 30 | Yes (26) | steroids | No |
| 392 | Flikweert 4 | 68 | M | None                         | 21 | Yes (21) |          | No |
| 393 | Flikweert 5 | 78 | M | HTN, CKD                     | 22 | Yes (21) | steroids | No |
| 394 | Flikweert 6 | 83 | M | HTN, DM                      | 13 | Yes (9)  |          | No |
| 395 | Flikweert 7 | 74 | M | None                         | 36 | Yes (36) | steroids | No |
| 396 | Kommos 1    | 41 | M | Fatty liver disease          | 2  | No       |          | No |

|     |            |    |   |                                                          |    |          |                      |    |
|-----|------------|----|---|----------------------------------------------------------|----|----------|----------------------|----|
| 397 | Kommoss 2  | 78 | M | None                                                     | 12 | Yes (12) |                      | No |
| 398 | Kommoss 3  | 80 | M | Prostate cancer                                          | 6  | No       |                      | No |
| 399 | Kommoss 4  | 81 | F | HTN, COPD, obesity                                       | 4  | No       |                      | No |
| 400 | Kommoss 5  | 90 | F | HTN, DM, obesity, CRF                                    | 2  | No       |                      | No |
| 401 | Kommoss 6  | 84 | M | CAD                                                      | 13 | Yes (8)  |                      | No |
| 402 | Kommoss 7  | 79 | M | DM, CAD, COPD                                            | 9  | Yes (8)  |                      | No |
| 403 | Kommoss 8  | 82 | M | HTN, COPD, CAD                                           | 28 | Yes (6)  |                      | No |
| 404 | Kommoss 9  | 60 | M | HTN, Ank Spondylitis                                     | 27 | Yes (20) |                      | No |
| 405 | Kommoss 10 | 71 | M | CAD                                                      | 30 | Yes (15) |                      | No |
| 406 | Kommoss 11 | 76 | F | HTN, DM                                                  | 24 | Yes (24) |                      | No |
| 407 | Kommoss 12 | 76 | M | HTN, DM, CAD                                             | 33 | Yes (31) |                      | No |
| 408 | Kommoss 13 | 72 | M | HTN, DM CAD, CKD                                         | 19 | Yes (22) |                      | No |
| 409 | Konopka 1  | 37 | M | Asthma, DM2                                              |    | Yes (6)  | steroids             | No |
| 410 | Konopka 2  | 46 | M | Asthma, DM2                                              |    | Yes (8)  |                      | No |
| 411 | Konopka 3  | 79 | F | DM2, renal transplant, bipolar disorder                  |    | No       | tocilizumab          | No |
| 412 | Konopka 4  | 63 | F | DM2, HTN, CAD                                            |    | Yes (16) | Sarilumab or placebo | No |
| 413 | Konopka 5  | 49 | F | CAD                                                      | 0  | No       |                      | No |
| 414 | Konopka 6  | 44 | M | None                                                     | 0  | No       |                      | No |
| 415 | Konopka 7  | 55 | M | CAD, DM2, IHD                                            | 0  | No       |                      | No |
| 416 | Konopka 8  | 67 | M | Drug use disorder                                        | 0  | No       |                      | No |
| 417 | Grosse 1   | 81 | M | DM, malignancy, respi disease, liver fibrosis/cirrhosis  | 2  | ND       |                      | No |
| 418 | Grosse 2   | 71 | M | CAD, neurologic disease, resp disease, chronic gastritis | 41 | ND       |                      | No |
| 419 | Grosse 3   | 75 | M | CAD, HTN, CKD, malignancy, resp disease                  | 7  | ND       |                      | No |
| 420 | Grosse 4   | 94 | F | CAD, HTN, CKD                                            | 24 | ND       |                      | No |
| 421 | Grosse 5   | 55 | M | CAD                                                      | 11 | ND       |                      | No |
| 422 | Grosse 6   | 81 | M | CAD, HTN, neurologic disease                             | 38 | ND       |                      | No |
| 423 | Grosse 7   | 87 | M | CAD, HTN, respi disease                                  | 9  | ND       |                      | No |
| 424 | Grosse 8   | 83 | F | CAD, HTN, neurologic disease                             | 11 | ND       |                      | No |
| 425 | Grosse 9   | 90 | F | CAD, HTN, CKD, DM                                        | 61 | ND       |                      | No |
| 426 | Grosse 10  | 84 | F | CAD, CKD, DM                                             | 22 | ND       |                      | No |
| 427 | Grosse 11  | 80 | F | CAD, HTN, CKD, neurologic disease, DM                    | 41 | ND       | steroids             | No |



|     |                    |    |   |                                                    |    |          |          |     |
|-----|--------------------|----|---|----------------------------------------------------|----|----------|----------|-----|
| 428 | Grosse 12          | 72 | M | CAD, HTN, gastritis                                | 26 | ND       |          | No  |
| 429 | Grosse 13          | 94 | M | CAD, HTN, neurologic disease, resp disease         | 71 | ND       |          | No  |
| 430 | Grosse 14          | 82 | M | CAD, CKD, DM, malignancy, resp disease             | 56 | ND       |          | No  |
| 431 | Antinori / Carsana | 73 | M | DM, HTN, hyperthyroid, AF, obesity                 | 14 | Yes (9)  |          | Yes |
| 432 | De Michele 1       | 70 | M | HTN, cardiac disease                               |    | No       |          | No  |
| 433 | De Michele 2       | 61 | M | HTN                                                |    | No       |          | No  |
| 434 | De Michele 3       | 80 | M | HTN, Cardiac disease, Cancer, Lung disease, others | 1  | Yes (1)  |          | No  |
| 435 | De Michele 4       | 60 | F | HTN, DM, Others                                    |    | No       |          | No  |
| 436 | De Michele 5       | 83 | M | HTN, cardiac disease, cancer, other                | 2  | No       |          | No  |
| 437 | De Michele 6       | 68 | M | HTN, other                                         | 2  | Yes (2)  |          | No  |
| 438 | De Michele 7       | 57 | M | HTN, other                                         |    | No       |          | No  |
| 439 | De Michele 8       | 73 | M | HTN, DM                                            |    | No       |          | No  |
| 440 | De Michele 9       | 68 | F | HTN, other                                         | 23 | Yes (23) | steroids | No  |
| 441 | De Michele 10      | 97 | F | HTN, cardiac disease, cancer, other                |    | No       |          | No  |
| 442 | De Michele 11      | 75 | M | HTN, DM, cardiac disease, lung disease, other      | 5  | No       |          | No  |
| 443 | De Michele X       |    |   |                                                    |    | No       |          | Yes |

Abbreviation: ND - no data
